# Supplementary material
Source: MDPI journal article supplement (https://www.mdpi.com/2073-4433/13/8/1270)
Supplement: s1 [file s1 › atmosphere-1836230-supplementary.pdf]

## Supplementary Information (SI)

### Particle loss rates in thermo-denuder (TD)

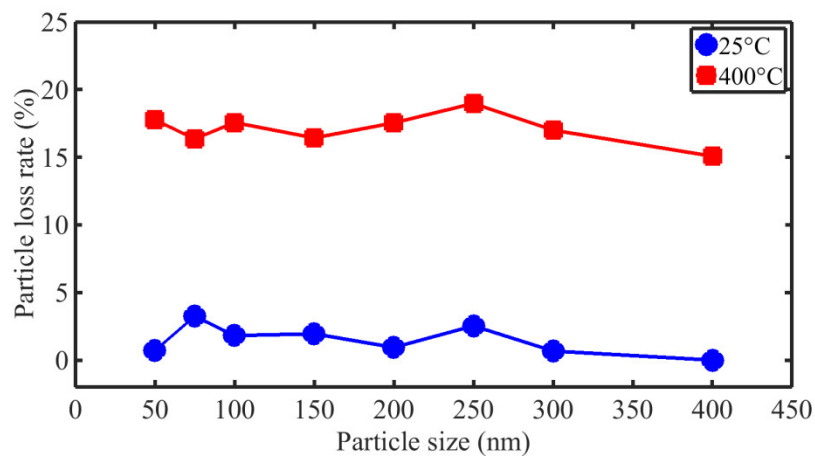

Figure S1: Particle loss rates at 25°C and 400°C in the thermo-denuder (TD) as a function of particle size.

### POA mass fraction as a function of the $d/p$ ratio

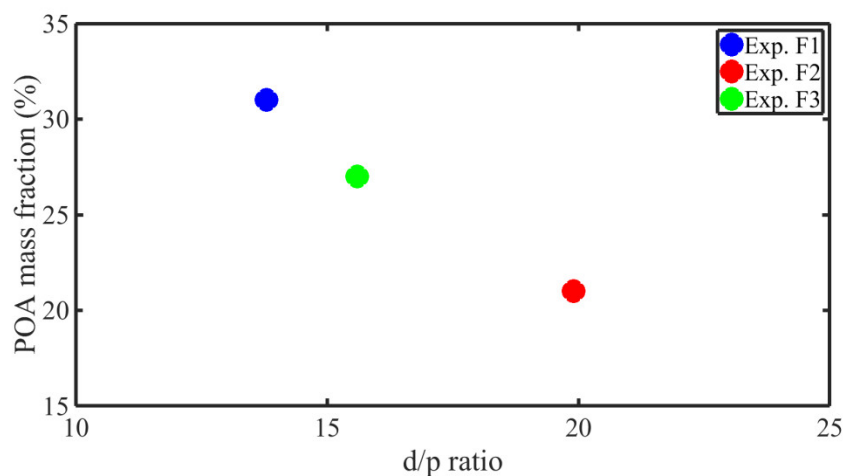

Figure S2: POA mass fraction as a function of the  $d/p$  ratio associated with Exp. F1, Exp. F2 and Exp. F3. POA mass fraction was averaged from five sizes soot shown in Figure 3.
